# Supplementary material
Source: PubMed Central journal article supplement (PMC6814691)
Supplement: 12250_2019_123_MOESM1_ESM.pdf [file 12250_2019_123_MOESM1_ESM.pdf]

## Electronic Supplementary Material

# Phosphatidylserine-Specific Phospholipase A1 is the Critical Bridge for Hepatitis C Virus Assembly

Qi Yang<sup>1,2</sup>, Min Guo<sup>3</sup>, Yuan Zhou<sup>2</sup>, Xue Hu<sup>2</sup>, Yun Wang<sup>2</sup>, Chunchen Wu<sup>2</sup>, Min Yang<sup>1</sup>, Rongjuan Pei<sup>2</sup>✉, Xinwen Chen<sup>2</sup>, Jizheng Chen<sup>2</sup>✉

1. Department of Gastroenterology, Guangzhou Women and Children's Medical Center, Guangzhou 510623, China

2. State Key Laboratory of Virology, Wuhan Institute of Virology, Chinese Academy of Sciences, Wuhan 430071, China

3. School of Life Science & Technology, China Pharmaceutical University, Nanjing 210009, China

Supporting information to DOI: 10.1007/s12250-019-00123-2

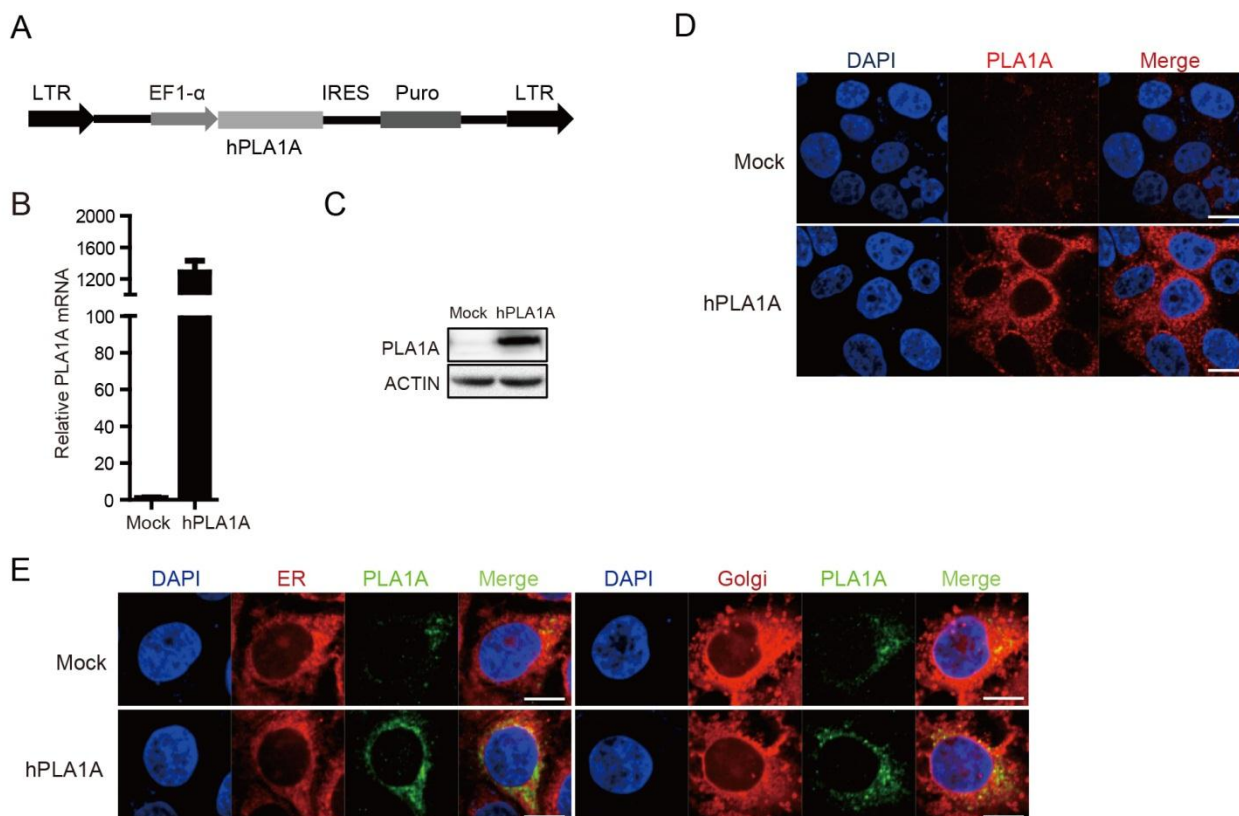

Figure S1. Establishment of Huh7.5.1 cells stably overexpressing PLA1A. (A) A schematic representation of stably overexpressing PLA1A plasmid. LTR, long terminal repeat; EF1- $\alpha$  promoter; Puro, puromycin resistance gene; IRES, EMCV internal ribosome entry site. (B-C) Huh-7.5.1 cells were infected with packaged PLA1A genes lentivirus or an irrelevant nontargeting control, and cell pools with stable expression were established. Amounts of PLA1A mRNA and protein levels in either cell pool were quantified by RT-qPCR and western blot, respectively. The graph represents the mean values from three independent experiments and standard deviations of the means. (D) PLA1A-specific stably overexpressing was determined at the single-cell level by immunofluorescence. Scale bars represent 10  $\mu$ m. (E) Subcellular distribution and colocalization of PLA1A in Huh7.5.1 cells stably overexpressing PLA1A. Immunofluorescence was performed using antibodies against PLA1A and cellular organelle dyes. Blue, DAPI; Red, ER or Golgi tracker; Green, PLA1A and merge. Scale bars represent 8  $\mu$ m.

Table S1. The Primers

Primers used to amplify the different deletions of PLA1A

| PLA1A deletions  | Orientation | Sequence (5'–3')                                                    |
|------------------|-------------|---------------------------------------------------------------------|
| PLA1A            | F/R         | <b>AAGCTT</b> ATGCCCCAGGTCCTGG/ <b>GGTACCCTA</b> CTACACACAGGCTATC   |
| 81-456           | F81/R       | <b>AAGCTT</b> CACTCTGGGAACCAAAC/ <b>GGTACCCTA</b> CTACACACAGGCTATC  |
| $\Delta$ 81-217  | OCF         | AAACTCTGGGTTC AATGCACAGACACCGACAATTG                                |
| $\Delta$ 81-217  | OCR         | CAAATTGTCGGTGTCTGTAGTTTGGTTCCAGAGTG                                 |
| $\Delta$ 218-258 | OCF         | TTCGTGGAAGCCATCCACGATCACATGAGGGCTGTG                                |
| $\Delta$ 218-258 | OCR         | CACAGCCCTCATGTGATCGTGGATGGCTTCCACGAA                                |
| 1-258            | F/R258      | <b>AAGCTT</b> ATGCCCCAGGTCCTGG/ <b>GGTACCCTA</b> ACAGCCCTCATGTGATCA |
| 1-376            | F/R376      | <b>AAGCTT</b> ATGCCCCAGGTCCTGG/ <b>GGTACCCTA</b> CTTAGGTATGGTGATCTT |

F indicate forward primers; R indicate reverse primers; OCF and OCR indicate overlapping complementation forward or reverse primers, respectively. Red color denote *Hind* III(forward) or *Kpn* I (reverse) restriction site. Blue color denote termination codon.

Primers used to amplify the different deletions of NS2

| NS2 deletions  | Orientation | Sequence (5'–3')                                                           |
|----------------|-------------|----------------------------------------------------------------------------|
| NS2            | F/R         | <b>AAGCTT</b> TATGACGCACCTGTGCACG/ <b>CTGCAGCTA</b> AAGGAGCTTCC<br>ACCCC   |
| 1-197          | F/R197      | <b>AAGCTT</b> TATGACGCACCTGTGCACG/ <b>CTGCAGCTA</b> GAGTCGGGCGG<br>ACACGG  |
| 1-137          | F/R137      | <b>AAGCTT</b> TATGACGCACCTGTGCACG/ <b>CTGCAGCTA</b> GCCAGTCCACC<br>TGCC    |
| 1-93           | F/R93       | <b>AAGCTT</b> TATGACGCACCTGTGCACG/ <b>CTGCAGCTA</b> TAAAGAGGTAAG<br>CAGGCC |
| 25-217         | F25/R       | <b>AAGCTT</b> GGGTATAAAGACCCTCCTCGG/ <b>CTGCAGCTA</b> AAGGAGCTTC<br>CACCCC |
| 49-217         | F49/R       | <b>AAGCTT</b> CAGGAGTGGGTACCACCC/ <b>CTGCAGCTA</b> AAGGAGCTTCCA<br>CCCC    |
| 74-217         | F74/R       | <b>AAGCTT</b> GGTGTGGTGTGTTTGACATTACCAAATGGC                               |
| $\Delta$ 49-73 | OCF         | CCCTGGGGGAAGCCATGATTGGTGTGGTGTGTTTGACATTACCAAATG                           |
| $\Delta$ 49-73 | OCR         | GGTAATGTCAAACACCACCAATCATGGCTTCCCCCAG                                      |
| $\Delta$ 74-93 | OCF         | CGTCACTATATTCTGCCCGAGGGCCGCTTTGACACATG                                     |
| $\Delta$ 74-93 | OCR         | CATGTGTCAAAGCGGCCCTCGGGCAGAATATAGTGACGGCC                                  |

F indicate forward primers; R indicate reverse primers; OCF and OCR indicate overlapping complementation forward or reverse primers, respectively. Red color denote *Hind* III (forward) or *Pst* I (reverse) restriction site. Blue color denote termination codon.

## Primers used to amplify the different deletions of NS5A

| NS5A deletions | Orientation | Sequence (5'–3')                                                           |
|----------------|-------------|----------------------------------------------------------------------------|
| NS5A           | F/R         | <b>AAGCTT</b> TCCGGATCCTGGCTCCGC/ <b>GGTACCCT</b> AGCAGCACACGG<br>TGGTATC  |
| 1-352          | F/R352      | <b>AAGCTT</b> TCCGGATCCTGGCTCCGC/ <b>GGTACCCT</b> ACCTTGGGGGAG<br>GCGTCGG  |
| 1-338          | F/R338      | <b>AAGCTT</b> TCCGGATCCTGGCTCCGC/ <b>GGTACCCT</b> AACAACCAGCAA<br>CGGTGGG  |
| 1-250          | F/R250      | <b>AAGCTT</b> TCCGGATCCTGGCTCCGC/ <b>GGTACCCT</b> AATAGGTGTTGCT<br>GTGG    |
| 1-213          | F/R213      | <b>AAGCTT</b> TCCGGATCCTGGCTCCGC/ <b>GGTACCCT</b> AAGTCTCCGCCGT<br>GATGTG  |
| 339-466        | F339/R      | <b>AAGCTT</b> GCTCTCCCCCCCCCAAG/ <b>GGTACCCT</b> AGCAGCACACGG<br>TGGTATC   |
| 214-466        | F214/R      | <b>AAGCTT</b> GCGGCGCGGCGCTTGGC/ <b>GGTACCCT</b> AGCAGCACACGGT<br>GGTATC   |
| 1-213-Δ5-11    | F11         | <b>AAGCTT</b> TCCGGATCCTGGGTTTGCACCATC                                     |
| 1-213-Δ5-11    | R213        | <b>GGTACCCT</b> AAGTCTCCGCCGTGATGTG                                        |
| Δ28-100        | OCF         | TGGCTGACCTCTAAATTGAAACCCCCACGAACTAC                                        |
| Δ28-100        | OCR         | GTAGTTTCGTGGGGGGTTTCAATTTAGAGGTCAGCCAATTTTTG                               |
| Δ101-213       | OCF         | GAGGGCCAGTGC GCGCCGCGCGCGCGCTTGGCACG                                       |
| Δ101-213       | OCR         | GCCAAGCGCCGCGCCGCGCGCGCACTGGCCCTCCGTG                                      |
| 28-466         | F28/R       | <b>AAGCTT</b> TTCCCAAGCTGCCCGGC/ <b>GGTACCCT</b> AGCAGCACACGG<br>TGGTATC   |
| Δ101-128       | OCF         | GCCAGTGC GCGCCGTATGTAACAGGACTGACCACTGAC                                    |
| Δ101-128       | OCR         | GGTCAGTCCTGTTACATACGGCGCGCACTGGCCCTCC                                      |
| Δ129-163       | OCF         | CAGCATGGGTCGTA CTCCACACCAAAGCCGTTTTTC                                      |
| Δ129-163       | OCR         | GAAAAACGGCTTTGGTGTGGAGTACGACCCATGCTGCG                                     |
| Δ164-183       | OCF         | ATCCATAGTTTTGCACCCGTCCGGTCCAGCTTCCC                                        |
| Δ164-183       | OCR         | GGGAAGCTGGGACCCGACGGGTGCAAACCTATGGATCTG                                    |
| Δ 184-213      | OCF         | GGCTTAATTCCATGCTGCGGCGCGGCGCTTG                                            |
| Δ 184-213      | OCR         | AGCGCCGCGCCG CAGCATAGGAATTAAGCCCAAC                                        |
| 101-466        | F101/R      | <b>AAGCTT</b> AAACCCCCACGAACTAC/ <b>GGTACCCT</b> AGCAGCACACGG<br>TGGTATC   |
| 1-100          | F/R100      | <b>AAGCTT</b> TCCGGATCCTGGCTCCGC/ <b>GGTACCCT</b> ACGGCGCGCACT<br>GGCCCTCC |
| 60-466         | F60/R       | <b>AAGCTT</b> GGCGCCAACATCTCTGGC/ <b>GGTACCCT</b> AGCAGCACACGG<br>TGGTATC  |

F indicate forward primers; R indicate reverse primers; OCF and OCR indicate overlapping complementation forward or reverse primers, respectively. Red color denote *Hind* III (forward) or *Kpn* I (reverse) restriction site. Blue color denote termination codon.

## Site-directed mutagenesis of NS5A

| NS5A deletions | Orientation | Sequence (5'–3')                                                          |
|----------------|-------------|---------------------------------------------------------------------------|
| NS5A           | F/R         | <b>AAGCTT</b> TCCGGATCCTGGCTCCGC/ <b>GGTACCCT</b> AGCAGCACACGG<br>TGGTATC |
| m184-188       | OCF         | TAATTCCTATGCTGCCGCGGCCGCGGCTCCCTGTGAACCTG                                 |
| m184-188       | OCR         | TCAGGTTACAGGGAGCCGCGGCCGCGGCAGCATAGGAATTAAG                               |
| m189-193       | OCF         | GGGTCCCAGCTTGCCGCTGCAGCTGCGCCCAGCAGACG                                    |
| m189-193       | OCR         | GTCTGCGTCGGGCGCAGCTGCAGCGGCAAGCTGGGACCCGAC                                |
| m194-198       | OCF         | TGTGAACCTGAGGCCCGCCGAGCCGCATTGAGGTCCATGCTAAC                              |
| m194-198       | OCR         | CATGGACCTCAATGCGGCTGCGGCGGCCTCAGGTTACAGGG                                 |

|          |     |                                             |
|----------|-----|---------------------------------------------|
| m199-203 | OCF | GACGCAGACGTAGCGGGCGGCCGCGGCAACAGATCCGCCCCAC |
| m199-203 | OCR | TGGGGCGGATCTGTTGCCGCGGCCGCGCTACGTCTGCGTCGGG |
| m204-208 | OCF | AGGTCCATGCTAGCAGCTGCGGCCGCCATCACGGCGGAGACTG |
| m204-208 | OCR | TCTCCGCCGTGATGGCGGCCGAGCTGCTAGCATGGACCTC    |
| m209-213 | OCF | GATCCGCCCCACGCCGCGGCCGCGGCTGCGGGCGGGCGCTTG  |
| m209-213 | OCR | AGCGCCGCGCCGCAGCCGCCGCCGCGGCGTGGGGCGGATCTG  |

F indicate forward primers; R indicate reverse primers; OCF and OCR indicate overlapping complementation forward or reverse primers, respectively. Red color denote *Hind*III(forward) or *Kpn* I (reverse) restriction site. Blue color denote termination codon.

Primers used to amplify the different deletions of E2

| E2 deletions | Orientation | Sequence (5'–3')                                                           |
|--------------|-------------|----------------------------------------------------------------------------|
| E2           | F/R         | <b>AAGCTT</b> GGCACCACCACCGTTGGAG/ <b>GGTACCCTA</b> TGCTTCGGCC<br>TGGCCC   |
| 29-367       | F29/R       | <b>AAGCTT</b> CAGCTCATTAAACACCAACGG/ <b>GGTACCCTA</b> TGCTTCGGC<br>CTGGCCC |
| 61-367       | F61/R       | <b>AAGCTT</b> ACCAACCGCTTTAACTCGTC/ <b>GGTACCCTA</b> TGCTTCGGCC<br>TGGCCC  |
| 144-367      | F144/R      | <b>AAGCTT</b> CCCACCTACACATGGGGAG/ <b>GGTACCCTA</b> TGCTTCGGCC<br>TGGCCC   |
| 189-367      | F189/R      | <b>AAGCTT</b> CGCACCAGAGCTGACTTC/ <b>GGTACCCTA</b> TGCTTCGGCCT<br>GGCCC    |
| 202-367      | F202/R      | <b>AAGCTT</b> TGCCCTACGGATTGTTTTAGG/ <b>GGTACCCTA</b> TGCTTCGGC<br>CTGGCCC |
| 273-367      | F273/R      | <b>AAGCTT</b> TGCGACTTGGAGGACAGGG/ <b>GGTACCCTA</b> TGCTTCGGCC<br>TGGCCC   |
| 1-272        | F/R272      | <b>AAGCTT</b> GGCACCACCACCGTTGGAG/ <b>GGTACCCTA</b> TCGAACGACG<br>TATTTTG  |
| 1-336        | F/R336      | <b>AAGCTT</b> GGCACCACCACCGTTGGAG/ <b>GGTACCCTA</b> AGCGATCCCCA<br>CGAGTG  |

F indicate forward primers; R indicate reverse primers; Red color denote *Hind* III (forward) or *Kpn* I (reverse) restriction site, respectively. Blue color denote termination codon.

Primers used to construct stably overexpressing PLA1A plasmid

| E2 deletions | Orientation | Sequence (5'–3')                                     |
|--------------|-------------|------------------------------------------------------|
| Pme1- PLA1A  | F           | <b>GTTTAAAC</b> GGAATGCCCCAGGTCCCTGGGAGAGCTGCTTCTGGG |
| Spe1-PLA1A   | R           | <b>ACTAGTCTA</b> CTACACACAGGCTATCTTCAGGTCACAGGAAAC   |

F indicate forward primers; R indicate reverse primers; Red color denote *Pme* I (forward) or *Spe* I (reverse) restriction site, respectively. Blue color denote termination codon

Table S2. Patients and liver biopsy data

| Gender | BMI   | Blood IU/mL (Log10) | Liver IU/mg (Log10) | PLA1A (fold) |
|--------|-------|---------------------|---------------------|--------------|
| F      | 23.48 | N                   | N                   | 1            |
| F      | 30.86 | N                   | N                   | 1.67         |
| F      | 20.73 | N                   | N                   | 1.13         |
| F      | 35.06 | N                   | N                   | 2.35         |
| F      | 26.68 | N                   | N                   | 1.24         |
| M      | 29.02 | N                   | N                   | 1.56         |
| M      | 34.2  | N                   | N                   | 2.1          |
| M      | 24.24 | N                   | N                   | 0.57         |
| M      | 22.18 | N                   | N                   | 0.81         |
| M      | 22.68 | N                   | N                   | 0.97         |
| F      | 24.24 | 6.53                | 8.12                | 19.73        |
| F      | 27.06 | 6.23                | 8.23                | 19.63        |
| F      | 24.22 | 5.75                | 8.39                | 22.98        |
| F      | 28.89 | 5.87                | 8.65                | 25.25        |
| F      | 26.95 | 6.08                | 8.04                | 21.26        |
| F      | 23.53 | 6.59                | 8.19                | 22.95        |
| M      | 24.26 | 5.63                | 8.63                | 29.62        |
| M      | 20.28 | 5.39                | 8.42                | 23.53        |
| M      | 24.22 | 6.42                | 8                   | 21.2         |
| M      | 20.83 | 6.03                | 8.14                | 32.29        |
| M      | 25.61 | 5.81                | 8.38                | 20.72        |
| M      | 24.8  | 6.68                | 8.19                | 24.64        |
| F      | 24.49 | 6.41                | 8.16                | 19.2         |
| M      | 24.49 | 6.58                | 8.1                 | 23.56        |
| M      | 21.13 | 6.61                | 8.33                | 26.47        |
| F      | 17.96 | 7                   | 8.64                | 25.66        |
| F      | 23.81 | 6.67                | 8.75                | 34.93        |
| F      | 23.44 | 6.41                | 8.09                | 23.14        |
| M      | 18.37 | 6.51                | 8.43                | 24.46        |
| F      | 23.26 | 6.65                | 7.8                 | 21.95        |
| M      | 18.37 | 6.53                | 8.13                | 21.94        |
| M      | 23.74 | 5.75                | 8.37                | 24.98        |
| F      | 20.55 | 5.87                | 8.81                | 32.33        |
| F      | 22.89 | 4.83                | 7.04                | 15.68        |
| M      | 22.49 | 6.68                | 8.3                 | 19.92        |
| M      | 31.11 | 6.99                | 8.37                | 22.87        |
| M      | 27.34 | 6.89                | 8.17                | 23.46        |
| M      | 22.15 | 6.37                | 8.28                | 22.36        |
| M      | 20.76 | 5.08                | 8.14                | 27.22        |
| M      | 20.01 | 4.99                | 7.87                | 19.62        |
| M      | 25.39 | 6.74                | 8.93                | 31.99        |
| M      | 29.41 | 4.89                | 6.3                 | 18.21        |
| M      | 19.38 | 4.94                | 6.37                | 15.98        |
| M      | 27.43 | 5.08                | 7.39                | 18.33        |
| M      | 18.34 | 5.03                | 7.65                | 17.23        |
| M      | 27.68 | 4.98                | 6.14                | 14.68        |
| M      | 19.84 | 5.16                | 7.26                | 19.97        |
| M      | 24.49 | 5.2                 | 6.38                | 16.9         |
